# Supplementary material for: Multilevel characteristics of TiOx transparent non-volatile resistive switching device by embedding SiO2 nanoparticles
Source: Research Square preprint supplement (doi:10.21203/rs.3.rs-276707/v1), 2021-03-03
Supplement: Supplementary file 2 [file 93942313bdd1627f3c0a0353.docx]

**Multilevel characteristics of TiOx transparent non-volatile resistive switching device by embedding SiO2 nanoparticles**

Sera Kwon1, Min-Jung Kim1, Kwun-Bum Chung1,*

1Division of Physics and Semiconductor Science, Dongguk University, Seoul, 04620, Republic of Korea

e-mail: kbchung@dongguk.edu


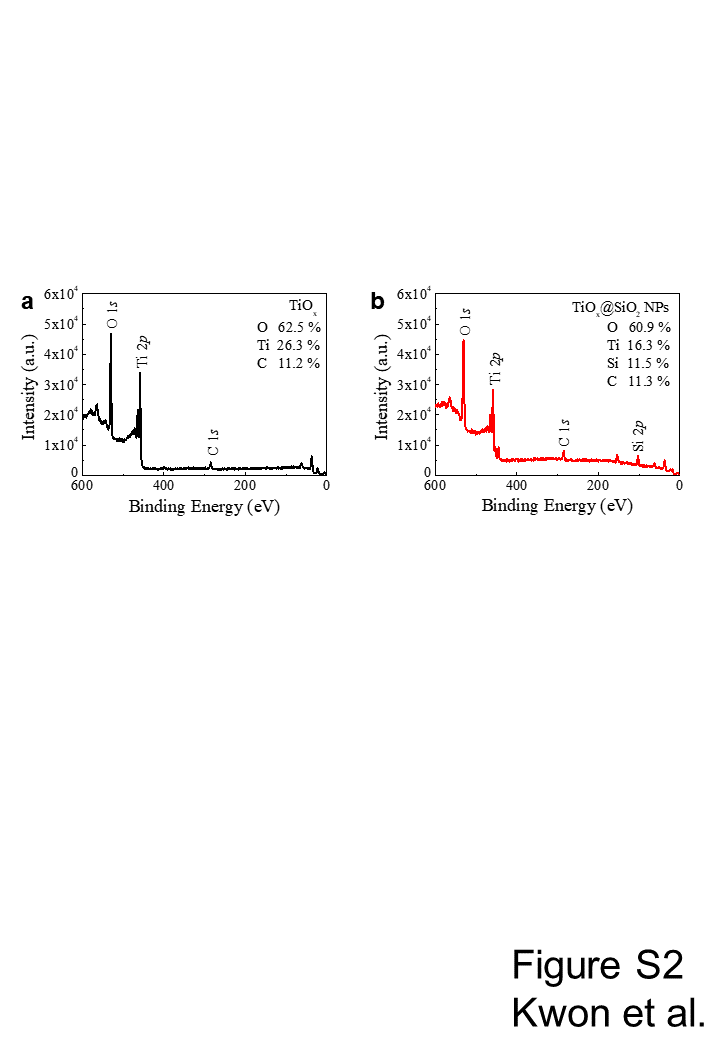


Figure S1. Survey spectra and compositions of (a) TiOx and (b) TiOx@SiO2 NPs films.


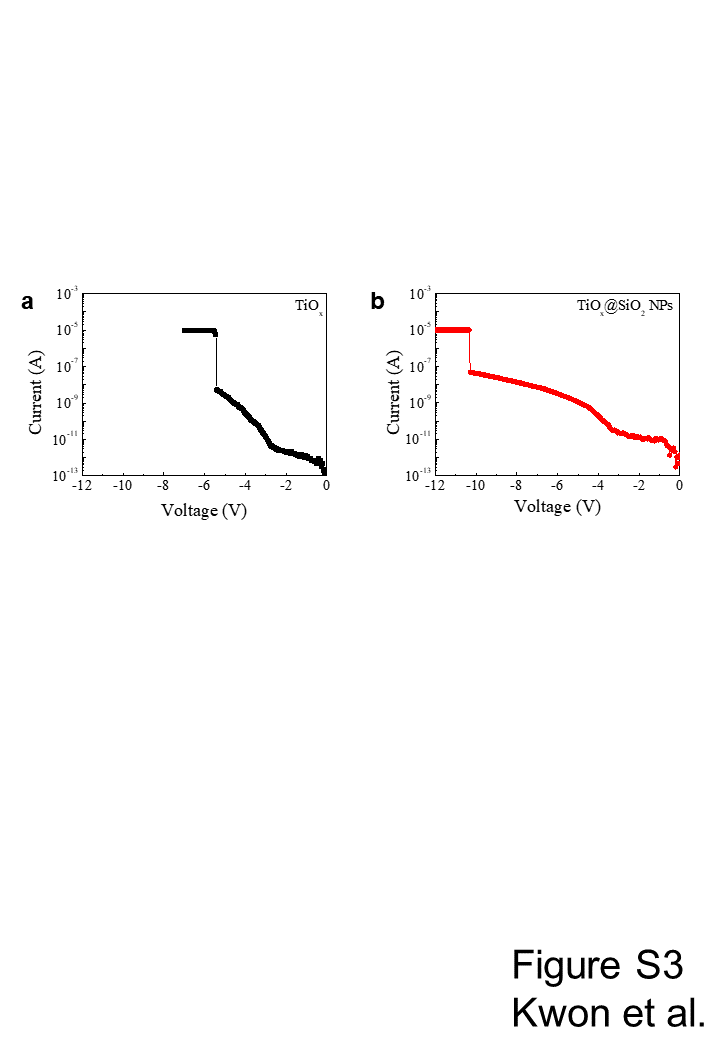


Figure S2. Electro-forming process of (a) TiOx and (b) TiOx@SiO2 NPs switching devices.


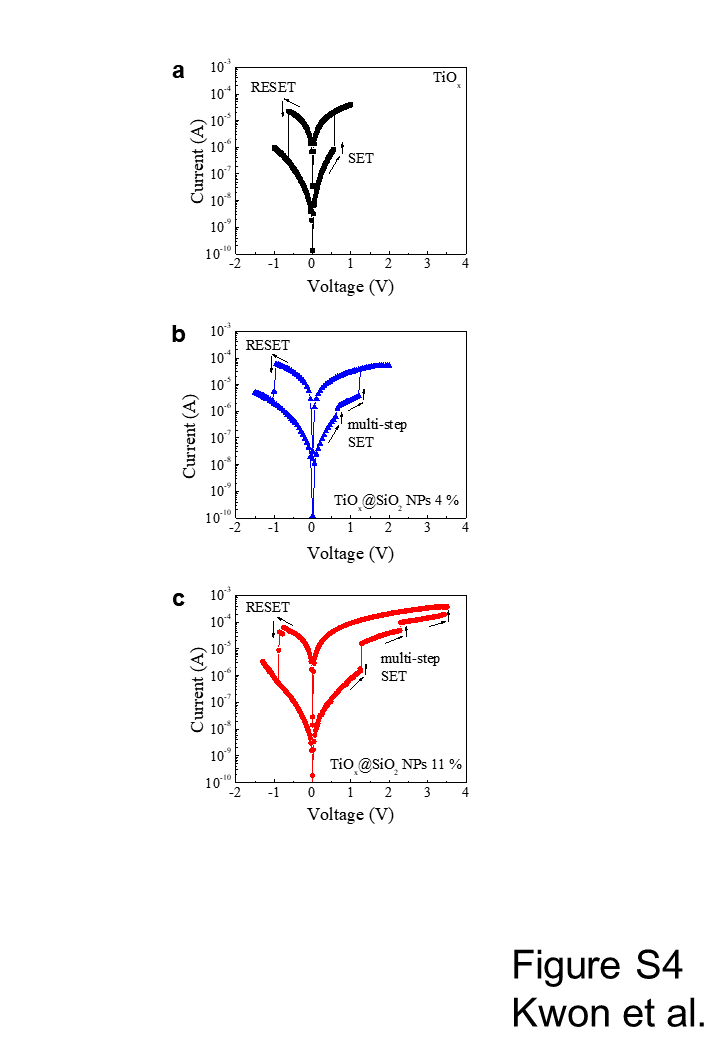


**Figure S3**. The resistive switching characteristics as a function of the composition of SiO2 NPs with (a) 0 %, (b) 4 %, and (c) 11 %.


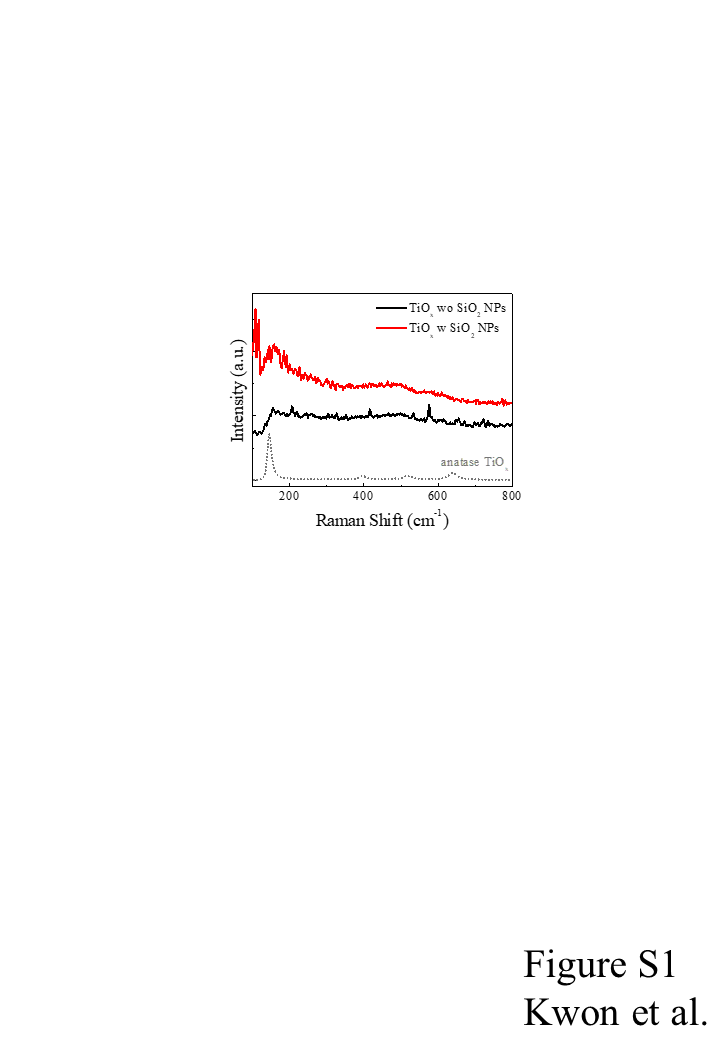


**Figure S4**. Raman spectra of TiOx and TiOx@SiO2 NPs films. Dotted lines indicate anatase TiOx.
